# Supplementary material for: Estrogen receptor (ER) was regulated by RNPC1 stabilizing mRNA in ER positive breast cancer
Source: PubMed Central journal article supplement (PMC4494937; doi:10.18632/oncotarget.3654), 2015-03-26
Supplement: oncotarget-06-12264-s001.pdf [file oncotarget-06-12264-s001.pdf]

## Estrogen receptor (ER) was regulated by RNPC1 stabilizing mRNA in ER positive breast cancer

### Supplementary Material

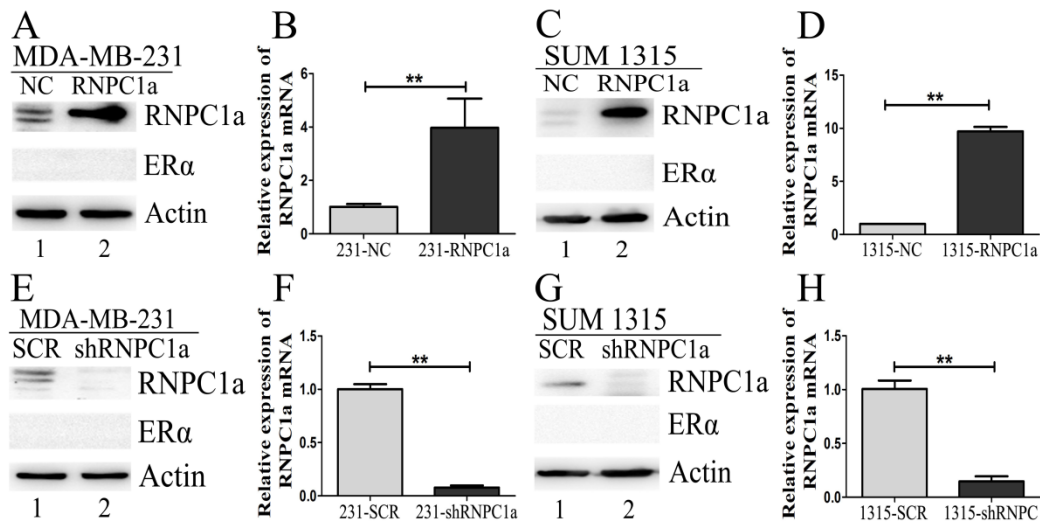

**Figure S1: RNPC1 couldn't affect ER $\alpha$  expression in ER negative breast cancer cells.**

(A, B, C, D) The expression of ER $\alpha$  was not influenced by RNPC1a overexpression.

(A, B) MDA-MB-231 was transfected with lentivirus containing either control luciferase (NC) or RNPC1a overexpression (RNPC1a). (A) Western blot and (B) qRT-PCR were used to analyze the expression of RNPC1a and ER $\alpha$ .

(C, D) The experiment shown in panel A was also performed in SUM 1315 cells. (C) Western blot and (D) qRT-PCR were used to analyze the expression of RNPC1a and ER $\alpha$ .

(E, F, G, H) The expression of ER $\alpha$  was not influenced by RNPC1a knockdown. (E, F) MDA-MB-231 was transfected with a control (SCR) and RNPC1a knockdown (shRNPC1a) lentivirus.

(E) Western blot and (F) qRT-PCR were used to analyze the

expression of RNPC1a and ER $\alpha$ . (G, H) The experiment shown in panel E was also performed in SUM 1315 cells. (G) Western blot and (H) qRT-PCR were used to analyze the expression of RNPC1a and ER $\alpha$ . The relative quantification was calculated by the  $\Delta\Delta\text{Ct}$  method and normalized based on  $\beta$ -actin. Data were means of three separate experiments and performed as mean  $\pm$  SEM, \*\*p < 0.01.

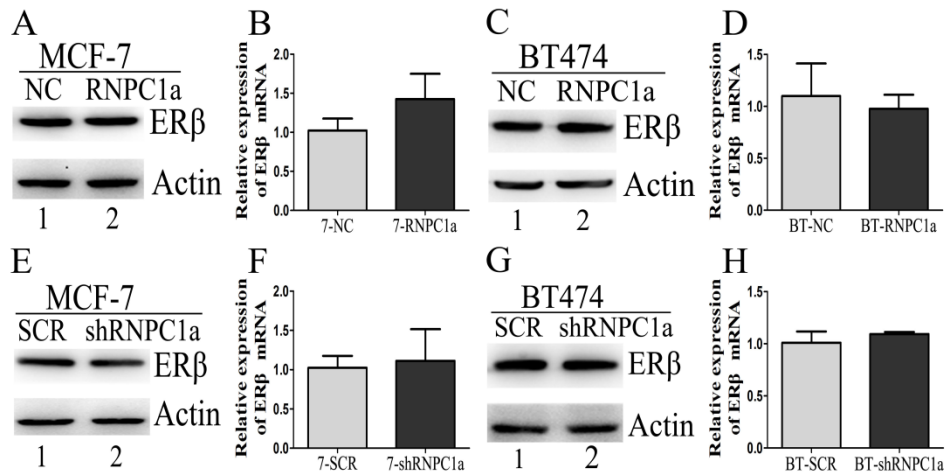

**Figure S2: ERβ expression was not affected by RNPC1a.**

(A, B, C, D) The expression of ERβ was not influenced by RNPC1a overexpression.

(A, B) MCF-7 was transfected with a control (NC) and RNPC1a overexpression (RNPC1a) lentivirus. (A) Western blot and (B) qRT-PCR were used to analyze the expression of ERβ. (C, D) The experiment shown in panel A was also performed in BT474 cells. (C) Western blot and (D) qRT-PCR were used to analyze the expression of ERβ.

(E, F, G, H) The expression of ERβ was not affected by RNPC1a knockdown.

(E, F) MCF-7 was transfected with a control (SCR) and RNPC1a knockdown (shRNPC1a) lentivirus. (E) Western blot and (F) qRT-PCR were used to analyze the expression of ERβ. (G, H) The experiment shown in panel E was also performed in BT474 cells. (G) Western blot and (H) qRT-PCR were used to analyze the expression of ERβ.

The relative quantification was calculated by the  $\Delta\Delta C_t$  method and normalized based on  $\beta$ -actin. Data were means of three separate experiments and performed as mean  $\pm$  SEM.

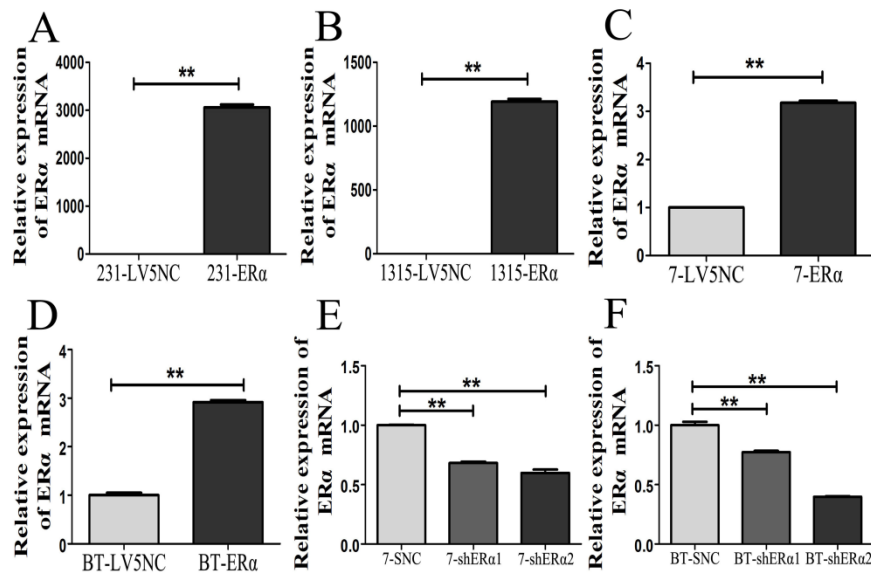

**Figure S3: ERα lentivirus was successfully transfected into breast cancer cells.**

(A, B) ERα was expressed in ER negative breast cancer cells after transfection. (A) MDA-MB-231 and (B) SUM 1315 were transfected with ERα overexpression (ERα) and the control (LV5NC) lentivirus. qRT-PCR were used to analyze the expression of ERα in the cells. (C, D) ERα was expressed in ER positive breast cancer cells after transfection. (C) MCF-7 and (D) BT474 were transfected with ERα overexpression (ERα) and the control (LV5NC) lentivirus. qRT-PCR were used to analyze the expression of ERα in the cells. (E, F) ERα was knocked down in ER positive breast cancer cells after transfection. (E) MCF-7 and (F) BT474 were transfected with ERα knockdown (shERα1, shERα2) and the control (SNC) lentivirus. qRT-PCR were used to analyze the expression of ERα in the cells. The relative quantification was calculated by the  $\Delta\Delta C_t$  method and normalized based on  $\beta$ -actin. Data were means of three separate experiments and performed as mean  $\pm$  SEM, \*\*p < 0.01.
